# Supplementary material
Source: PubMed Central journal article supplement (PMC5833627)
Supplement: jamaoncol-e172752-s001.pdf [file jamaoncol-e172752-s001.pdf]

## Supplementary Online Content

Emilsson L, García-Albéniz X, Logan RW, Caniglia EC, Kalager M, Hernán MA.  
Examining Bias in Studies of Statin Treatment and Survival in Patients With Cancer.  
*JAMA Oncology*. Published online August 20, 2017. doi:10.1001/jamaoncol.2017.2752

**eAppendix.** Inclusion criteria and codes from the PEDSF-file

**eTable 1.** Codes used to define the outcome and the covariates

**eTable 2.** Parameter estimates from regression model for statin treatment initiation

**eTable 3.** Construction of inverse probability weights

This supplementary material has been provided by the authors to give readers additional information about their work.

## eAppendix. Inclusion criteria and codes from the PEDSF-file

### *Variables used for checking enrollment:*

ghoMMM not equal to 0 - no enrollment with an HMO the actual month

monMMM = 3 - enrolled in part A & B the actual month

planYY\_MM = ("H", "R", "S", "E", "X") – enrolled in part D the actual month

where MMM and YY\_MM represents calendar months of registration.

### *Stage*

Stage=0      aj3sr1 = 00 or dajccstg1=00, 01 or 02

Stage=1      aj3sr1 = (10, 11, 12, 13, 18 or 19) or dajccstg1 = (10, 11, 12, 13, 14, 15, 16, 17,  
18 or 19)

Stage=2      aj3sr1 = (20, 21, 22, 23 or 29) or dajccstg1= (30, 32, 33 or 34)

Stage=3      aj3sr1 = (30, 31, 32, 33 or 39) or dajccstg1 = (50, 51, 52, 53, 54)

Stage=4      aj3sr1 = (40, 41, 42 or 49) or dajccstg1 = (70, 71, 72, 73 or 74)

### *Variables for further selection:*

beh1='3' & Stage >0 - selection of only invasive cancers (and cancers with complete staging)

dxconf1= ('1','2','4') - selection of microscopically confirmed cases

Stage < 4 – exclusion of metastatic cancers

agedx1 >=66 - first diagnosis at age 66 or later

**eTable 1. Codes used to define the outcome and the covariates.**

| Description                               | Code source                                       | Codes                                                                                                                                                                     |
|-------------------------------------------|---------------------------------------------------|---------------------------------------------------------------------------------------------------------------------------------------------------------------------------|
| <i>Outcomes</i>                           |                                                   |                                                                                                                                                                           |
| Death                                     | PEDSF-file                                        | Definition; death=1 if med_dodm is missing and Medicare death of death (med_dodm, med_dodd, med_dody) equals end of follow-up (otherwise death=0)                         |
| Cancer specific death                     | PEDSF-file                                        | The variable vsrtdx1 = 1 and Death (defined as above) =1                                                                                                                  |
| <i>Treatment</i>                          |                                                   |                                                                                                                                                                           |
| Statin                                    | String search of the GNN variable in the PDE file | combination or single therapies including any of the following; 'SIMVASTATIN', 'ATORVASTATIN', 'FLUVASTATIN', 'LOVASTATIN', 'PITAVASTATIN', 'PRAVASTATIN', 'ROSUVASTATIN' |
| <i>Comorbidities<sup>1</sup></i>          |                                                   |                                                                                                                                                                           |
| Tobacco                                   | ICD-9                                             | 305.1, 649.00, 649.01, 649.02, 649.03, 649.04, 989.84                                                                                                                     |
|                                           | HCPCS                                             | 99406, 99407                                                                                                                                                              |
| Obesity                                   | ICD-9                                             | 278.0, V85.3x, V85.4x                                                                                                                                                     |
| Depression                                | ICD-9                                             | 296.2x, 296.3x, 296.5x, 296.6x, 296.89, 300.4, 309.1, 311                                                                                                                 |
| Hyperlipidemia                            | ICD-9                                             | 272.0, 272.1, 272.2, 272.3, 272.4                                                                                                                                         |
| Hypertension                              | ICD-9                                             | 362.11, 401.x, 402.x, 403.x, 404.x, 405.x, 437.2                                                                                                                          |
| Anemia                                    | ICD-9                                             | 280.x, 281.x, 282.x, 283.x, 284.x, 285.x                                                                                                                                  |
| Cardiovascular disease                    |                                                   | Any of the index variables 1-6 included in the Charlson Klabunde index                                                                                                    |
| <i>Preventive visits<sup>2</sup></i>      |                                                   |                                                                                                                                                                           |
| Preventive visit and yearly wellness exam | HCPCS                                             | 99387, 99397, 99401, 99402, 99403, 99404, 99405, 99406, 99407, 99408, 99409, G0402, G0403, G0404, G0405, G0438, G0439                                                     |
| Bone mass measurement                     | HCPCS                                             | 76977, 77078, 77079, 76070, 76071, 77080, 76075, 76076, 77081, G0130                                                                                                      |
| Cervical and vaginal cancer screening     | ICD-9                                             | V72.31, V76.2, V76.47, V76.49, V15.89                                                                                                                                     |
|                                           | HCPCS                                             | G0101, G0123, G0124, G0141, G0143, G0144,                                                                                                                                 |

|                                     |                |                                                                                                                                                                                                    |
|-------------------------------------|----------------|----------------------------------------------------------------------------------------------------------------------------------------------------------------------------------------------------|
|                                     |                | G0145, G0147, G0148, P3000, P3001, Q0091                                                                                                                                                           |
| Cardiovascular disease screening    | ICD-9          | V81.0, V81.1, V81.2                                                                                                                                                                                |
|                                     | HCPCS          | 80061, 82465, 83718, 84478                                                                                                                                                                         |
| Diabetes screening                  | ICD-9          | V77.1                                                                                                                                                                                              |
|                                     | HCPCS          | 82947, 82950, 82951                                                                                                                                                                                |
| Glaucoma tests                      | ICD-9          | V80.1                                                                                                                                                                                              |
|                                     | HCPCS          | G0117, G0118                                                                                                                                                                                       |
| Abdominal aortic aneurysm screening | HCPCS          | G0389                                                                                                                                                                                              |
| Nutrition therapy services          | HCPCS          | 97802, 97803, 97804, G0270, G0271                                                                                                                                                                  |
| Pneumococcal shot                   | HCPCS          | 4040F, 90732, 90669, G0009, G8864                                                                                                                                                                  |
| Influenza shot                      | ICD-9          | 99.52                                                                                                                                                                                              |
|                                     | HCPCS          | 90655, 90656, 90657, 90658, 90660, 90659, 4037F, G0008, G8482, G8636, G9141, G9142, Q2035, Q2036, Q2037, Q2038, Q2039                                                                              |
| Mammography screening               | HCPCS          | 76092, 77052, 77057, G0202                                                                                                                                                                         |
|                                     | Revenue center | 0403                                                                                                                                                                                               |
| Colorectal cancer screening         | ICD-9          | 45.22, 45.23, 45.25, 45.24                                                                                                                                                                         |
|                                     | HCPCS          | 82270, 82272, 82274, G0328, G0107, 45378, 45380, 45381, 45382, 45383, 45384, 45385, 45386, 45387, 45391, 45392, G0105, G0121, 45330, 45331, 45333, 45334, 45335, 45338, 45339, 45340, 45341, 45342 |
| Prostate cancer screening           | ICD-9          | 89.34                                                                                                                                                                                              |
|                                     | HCPCS          | 84152, 84153, 84154, G0102, G0103, S0605                                                                                                                                                           |
| <i>Treatments</i>                   |                |                                                                                                                                                                                                    |
| Colon surgery                       | ICD-9          | 45.72, 45.73, 45.74, 45.75, 45.76, 45.8, 17.3, 17.31, 17.32, 17.33, 17.34, 17.35, 17.36, 17.37, 17.38, 17.39                                                                                       |
|                                     | HCPCS          | 44140, 44141, 44143, 44144, 44145, 44146, 44147, 44150, 44151, 44152, 44153, 44155, 44156, 44157, 44158, 44160, 44204, 44205, 44206, 44207, 44208, 44210, 44211, 44212                             |

|                                                                                                     | Betos          | P1B                                                                                                                                                                                                 |
|-----------------------------------------------------------------------------------------------------|----------------|-----------------------------------------------------------------------------------------------------------------------------------------------------------------------------------------------------|
| Rectal surgery                                                                                      | ICD-9          | 48.3, 48.40, 48.41, 48.42, 48.43, 48.49, 48.5, 48.50, 48.51, 48.52, 48.59, 48.6, 48.61, 48.62, 48.63, 48.64, 48.65, 48.69                                                                           |
|                                                                                                     | HCPCS          | 45110, 45395, 45111, 45112, 45113, 45114, 45116, 45119, 45120, 45121, 45123, 45126, 45160, 45170, 45397                                                                                             |
| Bladder surgery                                                                                     | ICD-9          | 57.6, 57.71, 57.79                                                                                                                                                                                  |
|                                                                                                     | HCPCS          | 51550, 51565, 51570, 51575, 51580, 51585, 51590, 51595, 51596                                                                                                                                       |
| Mastectomy                                                                                          | ICD-9          | 85.4, 85.4, 85.41, 85.42, 85.43, 85.44, 85.45, 85.46, 85.47, 85.48                                                                                                                                  |
|                                                                                                     | HCPCS          | 19180, 19182, 19200, 19220, 19240, 19303, 19304, 19305, 19306, 19307                                                                                                                                |
| Breast conservative surgery                                                                         | ICD-9          | 85.2, 85.2, 85.20, 85.21, 85.22, 85.23, 85.25                                                                                                                                                       |
|                                                                                                     | HCPCS          | 19120, 19125, 19126, 19160, 19162, 19301, 19302                                                                                                                                                     |
| Prostatectomy                                                                                       | ICD-9          | 60.5                                                                                                                                                                                                |
|                                                                                                     | HCPCS          | 55866, 55810, 55812, 55815, 55840, 55842, 55845                                                                                                                                                     |
| TURP /B (transurethral resection of prostate/bladder) / BCG (Bacillus Calmette-Guerin instillation) | HCPCS          | 51720, 52224, 52234, 52235, 52240                                                                                                                                                                   |
| Surgery                                                                                             |                | Defined as any of the included surgical strategies listed above.                                                                                                                                    |
| Chemotherapy <sup>3</sup>                                                                           | HCPCS          | J9000-J9999 <sup>4</sup> , Q0083-Q0085, J8520, J8521, J8530, J8540, J8560, J8597, J8610, J8999, 96401-96549                                                                                         |
|                                                                                                     | ICD-9          | 9925, V581, V662, V672                                                                                                                                                                              |
|                                                                                                     | Revenue center | 0331, 0332, 0335                                                                                                                                                                                    |
| Radiotherapy                                                                                        | ICD-9          | 92.2, 92.2, 92.20, 92.21, 92.22, 92.23, 92.24, 92.25, 92.26, 92.27, 92.29, 92.3, 92.3, 92.30, 92.31, 92.32, 92.33, 92.34, 92.35, 92.36, 92.37, 92.38, 92.39, 92.4, 92.4, 92.41, V58.0, V66.1, V67.1 |

|  |                |                                                                   |
|--|----------------|-------------------------------------------------------------------|
|  | HCPCS          | 77371-77373, 77401-77499, 77650-77699, G017', G0251, G0339, G0340 |
|  | Betos          | P7A                                                               |
|  | Revenue center | 0330, 0333, 0339                                                  |
|  |                |                                                                   |

The x in a code represents any number.

<sup>1</sup> Extracted according to codes available from <https://www.ccwdata.org/web/guest/condition-categories> : but instead of “at least 1 inpatient, or 2 outpatient or carrier claims required for a positive entry” we used the “remove.ruleout.dxcodes.macro.txt” that requires that all outpatient claims appear at least twice and are more than 30 days apart. The macro is available at <https://healthcaredelivery.cancer.gov/seermedicare/program/comorbidity.html>

<sup>2</sup> Relevant preventive visits and screening available to beneficiaries in Medicare according to : <https://www.medicare.gov/coverage/preventive-and-screening-services.html>

<sup>3</sup>To identify oral capecitabine in the DME file we used the following National Drug Codes: 00004110020, 00004110150, 00004110116, 00004110051, 00004110013, 00004110022, 00004110113, 00004110151.

<sup>4</sup>Excluding the following codes from this sequence: J9003, J9165, J9175, J9202, J9209, J9212- J9226, J9240, J9295, J9381, J9395.

**eTable 2. Parameter estimates from regression model for statin treatment initiation**

| Variable                      | Month 0-5,<br>During the grace period for both<br>non-initiators and initiators |                | Month 6 to end of follow-up,<br>Used only for non-initiators |                |
|-------------------------------|---------------------------------------------------------------------------------|----------------|--------------------------------------------------------------|----------------|
|                               | Coefficient                                                                     | Standard error | Coefficient                                                  | Standard error |
| <b>Baseline variables</b>     |                                                                                 |                |                                                              |                |
| Intercept                     | -10.524                                                                         | 4.010          | -10.267                                                      | 2.823          |
| Month                         | -0.163                                                                          | 0.068          | 0.047                                                        | 0.015          |
| Month square                  | 0.019                                                                           | 0.014          | -0.002                                                       | 0.000*         |
| Stage 2                       | -0.049                                                                          | 0.096          | -0.133                                                       | 0.069          |
| Stage 3                       | -0.159                                                                          | 0.121          | -0.075                                                       | 0.084          |
| Sex, female                   | -0.009                                                                          | 0.133          | 0.004                                                        | 0.098          |
| Race, black                   | -0.200                                                                          | 0.125          | 0.090                                                        | 0.081          |
| Race, other                   | 0.303                                                                           | 0.125          | 0.09                                                         | 0.095          |
| Diagnosis year 2008           | -0.327                                                                          | 0.089          | -0.127                                                       | 0.059          |
| Diagnosis year 2009           | -0.390                                                                          | 0.093          | -0.179                                                       | 0.071          |
| Charlson score 1              | -0.303                                                                          | 0.113          | -0.117                                                       | 0.068          |
| Charlson score 2              | -0.406                                                                          | 0.171          | -0.212                                                       | 0.104          |
| Charlson score 3              | -0.307                                                                          | 0.237          | -0.218                                                       | 0.152          |
| Charlson score 4              | -0.362                                                                          | 0.316          | -0.406                                                       | 0.213          |
| Charlson score >4             | 0.056                                                                           | 0.364          | -0.418                                                       | 0.239          |
| CVD indication for statin     | -0.344                                                                          | 0.131          | -0.001                                                       | 0.087          |
| Married                       | -0.071                                                                          | 0.118          | 0.134                                                        | 0.087          |
| Separated                     | -1.191                                                                          | 0.721          | 0.371                                                        | 0.283          |
| Divorced                      | -0.074                                                                          | 0.160          | 0.072                                                        | 0.115          |
| Widowed                       | 0.046                                                                           | 0.130          | 0.050                                                        | 0.097          |
| Unknown marriage status       | -0.247                                                                          | 0.166          | 0.189                                                        | 0.111          |
| Tobacco                       | -0.056                                                                          | 0.242          | 0.318                                                        | 0.153          |
| Obesity                       | 0.116                                                                           | 0.226          | 0.293                                                        | 0.154          |
| Depression                    | 0.237                                                                           | 0.159          | -0.144                                                       | 0.124          |
| Hyperlipidemia                | 0.145                                                                           | 0.082          | 0.055                                                        | 0.056          |
| Hypertension                  | -0.214                                                                          | 0.082          | -0.026                                                       | 0.056          |
| Anemia                        | 0.016                                                                           | 0.107          | -0.123                                                       | 0.077          |
| Age at diagnosis              | 0.186                                                                           | 0.104          | 0.141                                                        | 0.073          |
| Age square                    | -0.001                                                                          | 0.001          | -0.001                                                       | 0.001          |
| Preventive score              | -0.028                                                                          | 0.060          | -0.039                                                       | 0.041          |
| Preventive score square       | -0.006                                                                          | 0.009          | 0.003                                                        | 0.006          |
| Site colorectal               | -0.360                                                                          | 0.133          | -0.355                                                       | 0.094          |
| Site breast                   | -0.208                                                                          | 0.161          | -0.331                                                       | 0.117          |
| Site bladder                  | -0.221                                                                          | 0.169          | -0.282                                                       | 0.126          |
| <b>Time-varying variables</b> |                                                                                 |                |                                                              |                |

|                            |        |       |        |       |
|----------------------------|--------|-------|--------|-------|
| Charlson score 1           | 0.362  | 0.107 | 0.338  | 0.065 |
| Charlson score 2           | 0.654  | 0.142 | 0.469  | 0.083 |
| Charlson score 3           | 0.673  | 0.186 | 0.544  | 0.108 |
| Charlson score 4           | 0.716  | 0.241 | 0.603  | 0.138 |
| Charlson score >4          | 0.509  | 0.289 | 0.911  | 0.147 |
| Charlson unknown           | -8.891 | 164.0 | -1.403 | 1.003 |
| Chemotherapy               | -0.355 | 0.229 | -0.434 | 0.218 |
| Surgery                    | -0.613 | 0.106 | -0.231 | 0.181 |
| Radiotherapy               | -0.152 | 0.127 | -0.282 | 0.172 |
| Tobacco                    | 0.634  | 0.208 | 0.794  | 0.178 |
| Obesity                    | 0.278  | 0.251 | 0.023  | 0.237 |
| Depression                 | -0.266 | 0.229 | -0.052 | 0.156 |
| Hyperlipidemia             | 1.729  | 0.083 | 1.713  | 0.058 |
| Hypertension               | 0.663  | 0.083 | 0.810  | 0.057 |
| Anemia                     | 0.030  | 0.107 | -0.182 | 0.081 |
| CVD indication for statins | 1.023  | 0.109 | 0.680  | 0.066 |

Summary statistics of the weights; mean 1.13, median 1.05, minimum 1, maximum 6.88.

\*rounded from 0.0004

### eTable 3. Construction of inverse probability weights

| Time point                             | Main analysis weights   |                               |
|----------------------------------------|-------------------------|-------------------------------|
|                                        | Statins arm             | No statins arm                |
| Grace period, month(j) $0 \leq j < m$  | 1                       | $1 / (1 - p_{\text{statin}})$ |
| End of grace period, month $j = m = 5$ | $1 / p_{\text{statin}}$ | $1 / (1 - p_{\text{statin}})$ |
| After grace period, month $j > m(5)$   | 1                       | $1 / (1 - p_{\text{statin}})$ |

$p_{\text{statin}}$  is the probability of initiating statins at each month given baseline and time varying comorbidities
